# Homomorphic ZW Chromosomes in a Wild Strawberry Show Distinctive Recombination Heterogeneity but a Small Sex-Determining Region

Jacob A Tennessen<sup>1</sup>, Rajanikanth Govindarajulu<sup>2,3</sup>, Aaron Liston<sup>4</sup> and Tia-Lynn Ashman<sup>2\*</sup>

<sup>1</sup>Department of Integrative Biology, Oregon State University, Corvallis, OR, USA

<sup>2</sup>Department of Biological Sciences, University of Pittsburgh, Pittsburgh, PA, USA

<sup>3</sup>Current affiliation: Department of Biology, West Virginia University, Morgantown, WV, USA

<sup>4</sup>Department of Botany and Plant Pathology, Oregon State University, Corvallis, OR, USA

\*Author for Correspondence: Tia-Lynn Ashman, Department of Biological Sciences, University of Pittsburgh, 215 Clapp Hall, 4249 Fifth Avenue, Pittsburgh, PA 15260, Phone: (412) 624-0984, Fax: (412) 624-4759, [tial@pitt.edu](mailto:tial@pitt.edu)

Short title: Strawberry Sex Chromosome Recombination Patterns

## Abstract

Sex chromosomes play a prominent role in development and evolution and have several characteristic features that distinguish them from autosomes. Across diverse taxa, recombination is typically suppressed at the sex-determining region (SDR) and proportionally elevated in the remainder of the chromosome or pseudoautosomal region (PAR). However, in most model taxa the sex chromosomes are ancient and highly differentiated from autosomes, and thus little is known about recombination dynamics of homomorphic sex chromosomes with incipient sex-determining mechanisms. Here we examine male function (pollen production) and female function (fruit production) in crosses of the dioecious octoploid strawberry *Fragaria chiloensis* in order to map the small and recently evolved SDR controlling both traits and to examine recombination patterns on the young ZW chromosome. The SDR occurs in a narrow 280kb window, in which the maternal recombination rate is lower than in the orthologous paternal region and the genome-wide average rate, but within the range of autosomal rate variation. In contrast to the SDR, the ZW recombination rate in the PAR is much higher than the rates of the ZZ or autosomal linkage groups, substantially overcompensating for the SDR rate. By extensively sequencing sections of the SDR vicinity in several crosses and unrelated plants, we show that W-specific divergence is elevated within a portion of the SDR and find only a single SNP to be in high linkage disequilibrium with sex, suggesting that any W-specific haplotype protected from recombination is not large. We hypothesize that selection for recombination suppression within the small SDR may be weak, but that fluctuating sex ratios could favor elevated recombination in the PAR to remove deleterious mutation on the W. Thus these results illuminate the recombination dynamics of a nascent sex chromosome with a modestly diverged SDR, which could be typical of other dioecious plants.

## Author Summary

In many species, the sex-determining chromosomes have distinct features relative to the rest of the genome, including unusual recombination rates. The wild strawberry *Fragaria chiloensis* possesses a recently evolved sex chromosome that illuminates the early stages of sex chromosome differentiation and adjustment of recombination rates. We examined the phenotypes of both male function (pollen production) and female function (fruit production) among hundreds of strawberry offspring resulting from several crosses, which allowed us to identify a narrow chromosomal region influencing both of these traits. We then examined and compared maternal and paternal recombination rates in the vicinity of this sex-determining region and all along the ZW sex chromosome. A region of suppressed recombination surrounding the sex gene(s) is relatively small, but substantial differences in recombination rate among the parents are seen on the sex chromosome outside of this region. These results help us to understand how sex-determining regions appear, are maintained, and impact the rest of the genome.

## Introduction

Sex chromosomes are genomic oddities, often with distinctive inheritance patterns, effective population sizes, recombination frequencies, and structural arrangements, leading to unique evolutionary dynamics [1],[2]. These unusual features give sex chromosomes a key role in numerous biological phenomena such as speciation [3-5], disease progression [6], whole-genome duplications [7],[8], and contribution to the genetics of complex traits including sexual

61 dimorphism [9-12]. Sex determination mechanisms across the tree of life are diverse, and include  
62 male heterogamety (XY inheritance), female heterogamety (ZW inheritance), and more complex  
63 scenarios (reviewed in [13]). Although sex phenotype is typically determined by only one or two  
64 genes, these functional element(s) frequently reside within a larger sex-determining region  
65 (SDR) which is inherited as a unit. The remainder of the sex chromosome outside the SDR,  
66 known as the pseudo-autosomal region (PAR), can also have distinct properties that distinguish it  
67 from ordinary autosomal sequence [14],[15]. One of the defining features of sex chromosomes is  
68 a specific and repeatable pattern of heterogeneity in recombination rate that has been seen across  
69 diverse taxa including vertebrates, arthropods, fungi, and flowering plants [16],[17]. That is, the  
70 SDR typically shows suppressed recombination in the heterogametic parent, while the PAR may  
71 show elevated recombination in these same individuals (reviewed in [15],[18]). The adaptive  
72 basis for these recombination patterns has been extensively examined theoretically [13],[19]. In  
73 brief, if an SDR-linked locus harbors an allele that is advantageous in one sex and  
74 disadvantageous in the other (i.e. sexually antagonistic mutations), recombinants will have  
75 decreased fitness and recombination suppression will be favored. In the case where sex is  
76 determined by two loci both carrying fertility/sterility mutations, recombinants lack both male  
77 and female fertility alleles and are thus neuters, making the suppression of recombination highly  
78 advantageous [1],[19],[20]. As recombination is suppressed, differential substitutions and  
79 transposable elements accumulate within the widening SDR, resulting in evolutionary strata of  
80 sequence divergence between X/Z and Y/W [16],[21]. Recombination is nonetheless usually  
81 required for faithful chromosome segregation, so the recombination rate of the PAR may  
82 increase in the heterogametic sex to compensate for the SDR [15],[17]. Even with elevated PAR

recombination, the total sex chromosome recombination rate averaged across the PAR and SDR is usually less than or equal to the genome-wide average [15].

The most extensively studied sex chromosomes, primarily in model animals systems, are ancient and highly heteromorphic, making it difficult to understand the initial stages of sex chromosome evolution [22],[23]. However, a much greater diversity of sex determining systems exists, especially in plants [13],[18],[24]. While few of the 15,600 dioecious species of flowering plants [25] have heteromorphic sex chromosomes, and the genetics of sex determination in the vast majority are unknown [2],[26], several recent studies have revealed homomorphic sex chromosomes with small SDRs [20],[27-34]. For instance, strikingly small SDR were identified in *Vitis* and *Populus*. The *Vitis* sex locus has been mapped to 143kb, so if there is a suppressed-recombination SDR at all, it must occur within this window [28]. The SDR in *Populus* is only ~100kb yet determines both male and female function [32]. The slightly larger SDRs (1-10Mb) in plant taxa such as *Actinidia* [34], *Carica* [29], and *Asparagus* (A. Harkess personal communication) are still relatively small on a chromosomal scale, and vastly so relative to cytogenetically heteromorphic chromosomes. Most previous studies in plants have examined XY systems in diploids (but see [33]), leaving open the question of whether similar small SDRs are common in ZW systems or in polyploids, the latter of which gains special importance in flowering plants given the potential association between dioecy and polyploidy [8],[35]. Furthermore, homomorphic sex chromosomes may not necessarily display any recombination heterogeneity, or it may be weak, and thus the resultant patterns of sequence divergence and linkage disequilibrium may be subtle or nonexistent. Such chromosomes, which largely resemble autosomes but for the SDR, could represent the precursors of heteromorphic chromosomes, although these are rare in flowering plants [26]. Alternatively, SDRs may remain small for tens

of millions of years, as in ratite birds [36], or control of sex may turn over so rapidly among distinct genomic regions that SDRs undergo minimal evolutionary change, as in the homomorphic sex chromosomes of many frogs [7],[37]. The strength of selection for expansion and divergence of the SDR likely depends on the degree of sexual dimorphism, and therefore the number of genes with alleles showing sex-specific fitness [38]. Whatever their eventual fate, homomorphic sex chromosomes, for which recombination still occurs along most or all of their length, present several advantages for research: fine-mapping candidate causal sex genes, assessing patterns of recombination heterogeneity, estimating the fitness of recombinants, and inferring chromosomal evolution in response to sex linkage [11],[39].

The wild strawberries, genus *Fragaria*, are a model system for early sex chromosome evolution [20],[40],[41]. Evolving from a hermaphroditic ancestor just 2 mya [42], the genus has diversified into species displaying various sexual systems, including gynodioecy (females and hermaphrodites), subdioecy (females, males, and hermaphrodites), and dioecy (females and males). In the gynodioecious diploid *F. vesca* subsp. *bracteata*, at least two unlinked loci harbor male sterility alleles, only one of which, on chromosome IV (out of seven haploid chromosomes, designated with Roman numerals I-VII), is heterozygous in females [43],[44]. *Fragaria vesca* subsp. *bracteata* is an ancestor of allo-octoploid *Fragaria* species ( $2n=8x=56$ ), having provided the chloroplast genome, a putative mitochondrial cytoplasmic male sterility (CMS) gene, and one of the four nuclear subgenomes (subgenome Av out of Av, B1, B2, and Bi) [42],[45-47]. It does not share its sex loci with the octoploid clade, though. Wild octoploid *F. virginiana* subsp. *virginiana* possesses a female-heterozygous SDR at the start of linkage group VI-B2-m (i.e., haploid chromosome six, subgenome B2, maternal chromosome), while wild octoploid *F. chiloensis* possesses a female-heterozygous SDR at the end of linkage group VI-Av-m

[11],[27],[45],[48]. Octoploid *Fragaria* are highly diploidized, such that these subgenomes remain evolutionarily distinct [45]. Thus, sex determination in this genus has frequently evolved independently, and/or exhibits a rapidly shifting genomic position. Moreover, since the octoploid clade arose 1 mya [42], and SDRs are not shared among the dimorphic species they appear to be some of the youngest studied to date.

*Fragaria chiloensis* occurs on or near the Pacific coasts of North and South America and is divided into several subspecies. While *F. virginiana* is subdioecious [48], *F. chiloensis* is nearly completely dioecious, although some hermaphrodites do occur [49]. Thus, *F. chiloensis* has undergone perhaps the greatest sexual differentiation in the genus with respect to the hermaphroditic *Fragaria* ancestor [40],[50]. Because male and female function both map to a single maternal genomic location with no previously observed recombination between them [27], *F. chiloensis* has all the hallmarks of a complete, albeit incipient, ZW sex chromosome. In fact, as all other flowering plant sex chromosomes showing evidence of recent origin (homomorphic, taxonomically restricted, small SDRs, etc.) are XY, *F. chiloensis* appears to possess the youngest plant ZW chromosome yet characterized. However, neither the precise genomic location of the SDR, its physical size, nor the recombination profile of the SDR-carrying chromosomes could be determined from the initial SSR-based linkage map [27].

Here we characterize the *F. chiloensis* sex chromosome with respect to Z- or W-specific recombination rates in the PAR and SDR, as well as recombination-dependent metrics like sequence divergence and linkage disequilibrium. To achieve this goal, we first precisely define the SDR by fine-mapping both male and female function. We substantially increase the numbers of both molecular markers and progeny for a previously described cross [27] and also examine

the two other crosses and several additional unrelated individuals. By analyzing SNPs both extremely close to the causal sex gene(s) and all along the sex chromosome, and by leveraging the large and highly duplicated genome as an internal control for recombination estimates of autosomes (i.e. of the autosomal VI homeologs and across the rest of the genome), we can infer the initial evolutionary adjustments in recombination rate and divergence that occur in response to sex linkage.

## Results

### Phenotypes

In order to define the SDR, we first phenotyped male and female function in hundreds of plants. In our largest cross, HM×SAL [27], 1285 seeds germinated overall and we obtained genotype and/or phenotype data from 1277 of these (S1 Table). We determined male function for 693 progeny (352 male sterile, 341 male fertile), and female function for 619 progeny (157 with fruit set <5% and thus “female sterile” as defined in Goldberg et al. [27]; mean flower number = 15.5). Male and female function were highly negatively correlated ( $R^2 = 0.75$ ;  $p < 10^{-15}$ ), such that 98% of male-sterile plants showed at least 5% fruit set, while only 50% of male-fertile plants showed at least 5% fruit set (Fig 1). Including total flower number in multiple regression analysis did not significantly improve the proportion of variance explained in the simple linear regression, suggesting little contribution of plant size to the relation between male and female function ( $R^2 = 0.76$ ;  $p < 10^{-6}$ ). Similar phenotype distributions were observed among two sets of



20 offspring from independent crosses (EUR and PTR, S2 Table), and among 16 additional unrelated plants (S3 Table).

**Fig 1. Sex phenotype distributions among HM×SAL offspring.** Male function is defined as the ability (male fertility, blue) or inability (male sterility, pink) to produce mature pollen and is a binary trait found in approximately half of the progeny. Female fertility is defined as the proportion of flowers producing fruit, and has a continuous though bimodal distribution, shown here partitioned into bins of 5%. Male and female function are highly negatively correlated, with nearly all male-fertile offspring showing <50% female fertility, and nearly all male-sterile offspring showing >50% female fertility.

## Target capture mapping

In order to initially map the SDR, we examined 42 HM×SAL offspring in a previously described target capture dataset (S4 Table) [45]. We observed 23 male-fertile offspring and 19 male-sterile offspring. Male function mapped to the end of the VI-Av-m (maternal) linkage group, as expected (LOD = 10.6; Fig 2) [27]. Specifically, the last recombination event before the male function region occurs after reference genome position Fvb6\_37.391Mb, after which only a single male-sterile individual (which does not recombine anywhere on the linkage group) has a genotype mismatching sex ( $R^2 = 0.91$ ;  $p < 10^{-15}$ ). Thus, these results suggest the SDR occurs somewhere within the remaining 1.482Mb of the chromosome (the “SDR vicinity”), on which we observed 10 SNPs in 9 targeted regions. An alternate, much weaker potential quantitative trait locus (“QTL”) on linkage group II-Av-p (LOD = 3.6; Fig 2) was assumed to be a statistical artifact and not pursued further, because it showed no significant association after

accounting for the QTL on VI-Av-m ( $R^2 = 0.04$ ;  $p > 0.1$ ). Female function showed the same bimodal distribution as seen in the complete dataset (Fig 1), with most (59%) samples showing a fruit set of either 0 (26%) or 1 (33%). The highest QTL for female function ( $R^2 = 0.77$ ;  $p < 10^{-13}$ ), treated as a quantitative trait, occurred at the same location on VI-Av-m as male function, peaking at Fvb6\_37.391Mb (LOD = 18.8). The best two-QTL model for female function included this region and was not significantly better than the single-QTL model.

**Fig 2. Male function LOD scores across the target capture linkage map.** The haploid chromosomes of the Fvb reference genome are denoted by white rectangles along the x-axis. Each haploid chromosome occurs on each of four subgenomes (Av, B1, B2, or Bi), shown as red or blue shaded bars. LOD scores for maternal and paternal linkage maps are shown on the y-axis. The highest LOD score occurs on linkage group VI-Av-m, peaking at 10.6 for the last ten segregating sites in the linkage group, all aligning after Fvb6\_37.391Mb. We subsequently validated this region on VI-Av-m using hundreds of additional offspring, and thus the second-highest LOD peak on linkage group II-Av-p (LOD = 3.6) appears not to be biologically meaningful.

## Amplicon fine mapping

In order to further fine-map the SDR and calculate recombination rates, we genotyped HM×SAL progeny at amplicons in the SDR vicinity. Of the 1285 HM×SAL progeny, we obtained useable genotypes from 1235 offspring, including 1215 with Av-m genotypes and 1196 with Av-p genotypes (S1 Table). Although the set of useable sites varied slightly among each of three sequencing rounds, by the third round we could genotype 36 segregating sites among 24 amplicons on VI-Av-m, and 24 segregating sites among 16 amplicons on VI-Av-p.

Recombinants were observed in all growing years and all sequencing rounds. We observed 32 plants that recombined on VI-Av-m, and these allowed us to further fine-map the male function region to a 280kb section between Fvb\_37.428Mb and Fvb6\_37.708Mb (Fig 3). Specifically, we observed near-perfect matches to male function at all sites between Fvb6\_37.566Mb and Fvb6\_37.682Mb, with two male-fertile downstream recombinants showing mismatched genotypes starting at Fvb6\_37.708Mb, and two upstream recombinants at Fvb\_37.428Mb, one of which was phenotyped as male fertile. Seven individuals (one male-sterile from the target capture genotyping described above, two more male-sterile, plus four male-fertile) had genotypes mismatching male function in this region. These individuals did not recombine anywhere in the SDR vicinity. With <1% of offspring mismatching, the correlation between genotype in this male function region and male function phenotype was very strong ( $R^2 = 0.96$ ;  $p < 10^{-15}$ ). The male function region resides entirely within a single scaffold of the Fvb reference genome, scf0513124\_6, minimizing the possibility of genome assembly errors in this region. The original *F. vesca* genome annotation identified 68 genes in this male function region (S5 Table). Two additional genes that do not overlap these genes appear in the most recent annotation [51] (S5 Table).

**Fig 3. Fine-mapped male and female function and recombination rates across the SDR vicinity.** Physical distance (Mb) along the distal end of Fvb6, encompassing portions of two genomic scaffolds (scf0513124\_6 and scf0513112a), is shown on the x-axis. All amplicon markers in the SDR vicinity in VI-Av-m (pink) and VI-Av-p (light blue) are plotted, with relative linkage map position (cM, arbitrarily starting at 0) shown on the y-axis. An X marks the position of the “universal marker” SNP on VI-Av-m which shows a high correlation with sex across the full set of unrelated plants. Recombination rates can be inferred from the slopes of lines connecting VI-Av-m (pink)

and VI-Av-p (light blue) markers. Three colored bars with arbitrary vertical position indicate different estimates of the SDR. The female-function region showing significantly higher correlation with fruit set than the surrounding regions is indicated with a dark purple bar. The male-function region, bounded by the recombinants which decrease the correlation with male function, is indicated with a dark red bar. The high W divergence region, within which most W-specific SNPs are observed, is indicated by an orange bar. The SDR encompasses a relatively small portion of the 39Mb chromosome. Maternal and paternal recombination rates are similar, except near the SDR, where they are lower in the mother.

The highest LOD (145.9) to quantitative female function was observed on VI-Av-m at Fvb6\_37.428Mb, and correlations that were not significantly weaker than this were observed between Fvb6\_37.428-37.708Mb (LOD = 143.1-145.9), precisely the extent of the male function region. Significantly worse correlations were observed upstream at Fvb6\_37.391Mb (LOD = 142.4) and downstream at Fvb6\_37.858Mb (LOD = 126.8), thus defining the limits of the 467kb female function region (Fig 3). A QTL analysis that included the seven linkage groups in homeologous group VI for which we had segregating markers among the sequenced amplicons of the SDR vicinity (VI-B2-m not observed) supported the single QTL on VI-Av-m. The correlation between SDR genotype and quantitative female function ( $R^2 = 0.76$ ;  $p < 10^{-15}$ ) was similar to the correlation between male sterility and quantitative female fertility (Fig 1).

# **Confirmation of SDR in additional crosses**

In order to examine the species-wide relevance of the HM×SAL results, we tested whether sex mapped to the SDR in two independent crosses. In the EUR cross, we genotyped

SDR-vicinity amplicons of 10 male-fertile and 10 male-sterile offspring. We observed 4 Av-m segregating sites and 3 Av-p segregating sites in EUR (S2 Table; Fig S1). Similarly, in the PTR cross we genotyped SDR-vicinity amplicons of 6 male-fertile offspring, 11 male-sterile offspring, and 3 offspring of unknown sex phenotype. We observed 12 Av-m segregating sites and 4 Av-p segregating sites in PTR (S2 Table; Fig S1). Among both EUR and PTR, all Av-m SNPs in the SDR vicinity showed a perfect match to sex, with no observed recombinants.

## Recombination

In order to calculate recombination rates along the entire ZW sex chromosome (VI-Av-m and VI-Av-p) and compare them to genome-wide patterns, we re-examined all linkage groups in the published *F. chiloensis* target capture maps [45]. Among all linkage groups we observed 747 maternal recombination events and 731 paternal recombination events, suggesting a genome-wide recombination rate of 2.5 cM/Mb given a genome size of approximately 700 Mb [52]. In order to examine variation in recombination rates across the genome, we calculated rates for 138 segments of 5-10Mb. Recombination rates varied from 0 to 7.0 cM/Mb (median = 2.3, mean = 2.5, standard deviation = 1.4; Fig 4). There was no significant difference between maternal and paternal recombination rates genome-wide (Wilcoxon rank sum test,  $p > 0.1$ ; Fig 4). Remarkably, among the 56 linkage groups, VI-Av-m (the ZW linkage group) had the second-highest observed recombination rate of 3.3 cM/Mb, only slightly exceeded by the rate of 3.4 cM/Mb observed on I-Av-p (S6 Table). A relatively high rate appears consistently across this entire VI-Av-m linkage group (Fig 4 pink circle) and is notably higher than the rate in all other VI linkage groups (Fig 5). Based on Fvb chromosome lengths, the VI-Av-m linkage group is

estimated to constitute 2.3% of the *F. chiloensis* genome, suggesting an expected 34 recombination events, a prediction significantly exceeded by the observed 53 recombination events on VI-Av-m (53:1425 vs. 34:1444 recombination events;  $\chi^2 = 4.3$ ,  $p < 0.05$ ). Conversely, VI-Av-p (the ZZ linkage group) had one of the lowest recombination rates at 1.7 cM/Mb (Fig 4 blue circle), lower than all other VI linkage groups (Fig 5), and with only 5 out of 56 linkage groups showing less recombination (S6 Table). Thus, recombination rate is nearly 2-fold higher between ZW chromosomes than between ZZ chromosomes (53:27 vs. 40:40 recombination events,  $\chi^2 = 4.3$ ,  $p < 0.05$ ).

**Fig 4. Genome-wide recombination rates compared to ZW rates.** The *F. chiloensis* target capture linkage maps were divided into sections of 5-10Mb, free from any known rearrangements. Recombination rate was calculated for each section, as shown in this histogram of maternal (pink) and paternal (light blue) recombination rates. Symbols indicate maternal and paternal recombination rates across the entire VI-Av linkage group (circles; ZZ or ZW), across the SDR vicinity from Fvb6\_37.38–38.29 (diamonds), and across the SDR from Fvb6\_37.38–37.71 Mb (triangles). Recombination is notably higher in the mother than in the father across VI-Av, but this pattern reverses at the SDR.

**Fig 5. Recombination events across all eight VI linkage groups.** Markers in each linkage group are plotted with physical Fvb reference genome position on the x-axis and centimorgan position on the y-axis. Recombination rates are therefore indicated by the slopes of the lines, as illustrated by the example slopes in the figure legend. Lines are color-coded based on subgenome, and are solid for maternal linkage groups and dashed for paternal linkage groups. The SDR is shown as a dark red box. For ease of visualization, markers showing radical rearrangements relative to the reference genome (<5% of all markers) have been removed. The VI-Av-m linkage group harboring the SDR has the highest recombination rate across the entire chromosome, while the VI-Av-p linkage group has the lowest recombination rate.

306

307        In order to test for recombination suppression at the SDR, we calculated maternal and  
 308        paternal recombination rates from the amplicon data. Across the 1Mb of the SDR vicinity in  
 309        which we observed segregating sites in amplicons, recombination rates were nearly identical on  
 310        VI-Av-m and VI-Av-p (2.9 cM/Mb maternal, 2.8 cM/Mb paternal; Fig 4 diamonds). However, in  
 311        the 330kb between Fvb6\_37.378-37.708Mb, containing the entire male function region and most  
 312        of the female function region, recombination was notably lower on VI-Av-m relative to VI-Av-p  
 313        (Fig 4 triangles). Specifically, there are six Av-m recombination events in this window (1.5  
 314        cM/Mb) compared to sixteen Av-p recombination events (4.1 cM/Mb) (6:1209 vs. 16:1180  
 315        recombination events;  $\chi^2 = 4.7$ ,  $p < 0.05$ ). In comparison to genome-wide rates, the  
 316        recombination rate at the SDR in VI-Av-m is lower than average, but not significantly so (given  
 317        2.5 cM/Mb mean rate, expect 10 recombination events between Fvb6\_37.378-37.708Mb, 6  
 318        observed;  $\chi^2 = 2.6$ ,  $p > 0.1$ ), and well within the range observed elsewhere in the genome (30%  
 319        quantile; Fig 4). Likewise, the recombination rate at the SDR in VI-Av-p is higher than the  
 320        genome-wide average but not an outlier. Unfortunately, we did not observe SNPs at both  
 321        boundaries of this interval in any other homeolog, and therefore we cannot directly compare  
 322        recombination rates among subgenomes specifically at the SDR.

323

## 324        **Divergence between W and Z**

325        In order to assess sequence divergence between W and Z chromosomes, we evaluated  
 326        SNPs in the vicinity of the SDR in the three crosses. In each of these, we classified SNPs as

327 either in coupling with male sterility/female fertility (W-specific), in repulsion in the mother, or  
328 segregating in the father (Fig S1). In all three crosses, we observed more SNPs that differentiate  
329 Z from W (52 total, not correcting for shared SNPs among crosses) than SNPs which differ  
330 between two Z chromosomes (31 total, not correcting for shared SNPs among crosses).  
331 Specifically, on VI-Av in HM×SAL, we observed 18 SNPs in coupling, and 18 SNPs in  
332 repulsion, with male sterility/female fertility, and 9 and 15 SNPs on each of the paternal Z  
333 haplotypes. On VI-Av in EUR, we observed 2 SNPs in coupling, and 2 SNPs in repulsion, with  
334 male sterility/female fertility, and 0 and 3 SNPs on each of the paternal Z haplotypes. On VI-Av  
335 in PTR, we observed 7 SNPs in coupling, and 5 SNPs in repulsion, with male sterility/female  
336 fertility, and 0 and 4 SNPs on each of the paternal Z haplotypes. Intriguingly, the highest  
337 concentration of W-specific SNPs occurred within the male-sterility region, specifically in a  
338 143kb “high W divergence” window between 37.565-37.708Mb, with 10 SNPs in coupling with  
339 male sterility/female fertility in HM×SAL, 4 in PTR, and 1 in EUR. For HM×SAL, the W-  
340 specific divergence (SNPs in coupling out of all sequenced sites) in the high W divergence  
341 window is 0.39%, substantially higher than both the 0.07% of sites segregating on a single Z  
342 haplotype in this window (observe 10:5 W:Z, expect 3.75:11.25,  $\chi^2 = 4.8$ ,  $p < 0.05$ ), and the  
343 0.06% W-specific divergence observed across all amplicons outside of this high-divergence  
344 window. The higher SNP counts observed in the HM×SAL cross relative to EUR and PTR  
345 crosses may be due to the parents of the former originating in different populations (and thus  
346 fewer SNPs segregating in both parents, which we ignored in our mapping methodology), as well  
347 as the much larger offspring sample size (and thus higher power to map SNPs even when a large  
348 proportion of offspring have missing genotypes). Nevertheless, a single G/C SNP, which occurs



within the high divergence window at position Fvb6\_37594072, was in coupling with male sterility/female fertility (W allele = C; Z allele = G) in all three crosses (Fig 3; Fig S1).

## Association between genotype and sexual phenotype in unrelated plants

In order to identify SNPs in linkage disequilibrium with the causal sex gene(s), we examined genetic diversity at SDR vicinity amplicons in 22 unrelated plants, 10 male-sterile and 12 male-fertile (the six parents of the crosses plus 16 additional plants). A single SNP showed a near-perfect correlation with sex: the same G/C SNP at Fvb6\_37594072 for which the C allele was in coupling with male sterility/female fertility (W) in all three crosses (Fig S1). The SNP was heterozygous (G/C) in 9 out of 10 male-sterile plants (ZW), and homozygous (G/G) in 11 of 12 male-fertile plants (ZZ). Due to its widespread and consistent association with sexual phenotype, we designated this SNP the “universal marker” (Fig 3; Fig S1). Four additional SNPs (Fvb6\_37565581, Fvb6\_37565641, Fvb6\_37567599, and Fvb6\_37567962; Fig S1), all within the high W divergence window of the male function region, showed a weaker association with sex, but all were heterozygous in 80-90% of male-sterile plants and homozygous in 60-70% of male-fertile plants.

## Discussion

Our study of incipient sex chromosomes in octoploid *F. chiloensis* illuminates how recombination rates may first begin to adjust in response to sex linkage. Sex chromosomes are characterized by having atypical recombination patterns relative to autosomes [16]. These unique

recombination dynamics are the evolutionary basis for the other unusual features of sex chromosomes, such as heteromorphy, rapid molecular evolution, degradation, and determination of hybrid incompatibility [53]. Recombination rates across the genome are determined by several factors: crossover motifs and the associated epigenetic and chromatin modifications, sequence divergence among sister chromatids including rearrangements such as inversions, and specific genes that dictate pairing compatibilities [54],[55]. Selection pressures to rapidly adjust recombination rates for nascent sex chromosomes are similar to those facing neopolyploids undergoing diploidization [54], and both processes may involve similar molecular mechanisms and a similar period of adaptation during which recombination patterns are not optimal. Here we have examined recombination in the youngest and least differentiated plant ZW chromosome yet described.

## **A small SDR**

In contrast to most older sex chromosomes, we do not observe a wide (>1Mb) SDR characterized by suppressed recombination. In fact, across most of the SDR vicinity targeted by amplicon sequencing, recombination rates were typical and nearly identical between VI-Av-m and VI-Av-p (Fig 3). Both male and female function mapped to a single 280kb chromosomal region within the region first identified by Goldberg et al. [27] at the distal end of VI-Av-m. The maximum possible extent of suppressed recombination occurs within a 330kb window centered on this SDR. Observed VI-Av-m recombination in this window is less than half that of VI-Av-p. However, the VI-Av-m recombination rate is not unusually low relative to autosomal rates. The fact that neither male nor female function was perfectly correlated with the SDR suggests that

other unlinked loci or environmental effects may also influence sex in *F. chiloensis*. This is especially likely for female function, a quantitative trait for which the SDR explains 74% of variation, but also one known to be highly environmentally labile in other *Fragaria* [56]. Such minor contributors to female function variation have also been seen in the subdioecious *Fragaria virginiana* which has a major SDR [11], and are known to segregate in the natural hybrid *F. × ananassa* subsp. *cuneifolia* [57]. Male function in contrast was almost perfectly determined by the SDR, with <1% of HM×SAL offspring showing a mismatch, suggesting that any other factors affecting the propensity to produce pollen are negligible.

We cannot determine whether male and female function are controlled by two closely linked genes, or both by the same gene. This question is relevant to recombination patterns because the primary theoretical basis for recombination suppression assumes two genes [19]. Presumably a single gene initially controlled a single phenotype such as male function, especially given the observed gynodioecy in the closely related *Fragaria vesca* subsp. *bracteata* [58] (but see [44]). Under the classic model of sex chromosome evolution [18],[19], a second linked mutation occurs such that there are two distinct linked genes controlling male and female function. Recombination between these genes produces neuters, prompting strong selection for recombination suppression. In *F. chiloensis*, the two-locus model would require a remarkably small physical distance between the two loci (within the predicted 280kb SDR), but this could arise either coincidentally or else via adaptive translocation of the second locus in order to achieve tight linkage. Because baseline recombination should only occur rarely within a 280kb region (fewer than 1% recombinant offspring at the 2.5 cM/Mb genomic mean rate), selection for additional recombination suppression would not be particularly strong. Although recombination between loci controlling male and female function would theoretically produce neuters [11],[18],

we observe only 7 out of 619 HM×SAL offspring showing both male and female sterility, none of which show recombination on VI-Av-m, and four of which produced only 1-2 flowers, and thus may have failed to fruit by chance. Alternatively, there may be only a single sex determinant at the SDR, as proposed for other dioecious systems in which only a single regulator of sex has been identified [59],[60]. A single sex-determining gene for *Fragaria* was proposed by Ahmadi and Bringham [61], although their genus-wide model was too simple given the distinct sex loci subsequently observed among species [11],[27],[43],[44],[48]. Ancestrally, individuals with ZZ genotypes may have been universally hermaphrodites, as in gynodioecious species with dominant male sterility allele(s) such as *F. vesca* subsp. *bracteata* [43],[44]. Variation in female function among male-fertile individuals could have been influenced by gene(s) anywhere in the genome, not necessarily on VI-Av. If males had higher fitness than hermaphrodites [62], alleles conferring female sterility (but only in male-fertile individuals) would increase in frequency or even fix, leading to the highly dioecious condition observed in *F. chiloensis* even without new sterility mutations on VI-Av. Selection could favor linkage of female fertility modifiers to the SDR, but such selection would be weak if these mutations had little phenotypic effect in females [63]. If a single gene controls both male and female function in *F. chiloensis*, there would only be selection for recombination suppression if other linked genes had alleles with differential fitness between sexes, i.e., antagonistic selection [15].

Although the causal sex gene(s) remain unidentified, as in most dioecious plants, several promising candidates are apparent among the 70 known genes in the SDR (S5 Table). One gene encodes a mitochondrial-targeted pentatricopeptide repeat protein, a molecular family commonly implicated in male fertility restoration when cytoplasmic genes cause sterility [64]. There are two methyltransferases, another gene family which may control sex in other plants [32]. A cluster of

five cystinosin homologs, out of only six in the entire Fvb genome, occurs in this window. Cystinosin mutations cause male sterility in humans [65], indicating a possible role for cystine transport in *Fragaria* sex function as well. Although we can't determine how close the universal marker is to the causal genes(s), there are 13 genes within 25kb of this SNP, including four F-box proteins, an abhydrolase domain-containing protein, and a glycerol-3-phosphate dehydrogenase. An exciting future direction will be to test SDR genes for sexual function or sexually antagonistic alleles.

## Recombination at the PAR

In addition to suppressed recombination at the SDR, sex chromosomes frequently show elevated recombination in the PAR [15]. In the case of *F. chiloensis*, the PAR represents over 99% of the 39Mb VI-Av chromosome. Thus the PAR recombination rate is approximated by examining the entire chromosome, over which VI-Av-m recombination is nearly twice as high as VI-Av-p recombination. Recombination rates are not as high on the other *F. chiloensis* VI linkage groups, and in fact are lower among all 56 *F. virginiana* linkage groups [45], suggesting that the high VI-Av-m rate in *F. chiloensis* is newly evolved. Although elevated PAR recombination has been attributed to compensation for suppressed SDR recombination [15], in *F. chiloensis* the PAR greatly over-compensates for the SDR. Thus, the adaptive value of this elevated recombination rate, if any, does not appear to involve compensation. Instead, perhaps there is a benefit for certain alleles to recombine away from the SDR, at least in the early stages of sex chromosome evolution. One intriguing possibility is that the effective population size of the W chromosome is relatively low due to fluctuating, male-biased sex ratios, which are

common in dioecious plants [66], and which could explain the high W-specific divergence. Population proportions of male-sterile plants may occasionally decrease under ecological conditions that favor hermaphrodites, which could lead to accumulation of deleterious mutations on the W, unless these are eliminated by recombination. Thus, high recombination in the Z-W PAR could be favored as a way to avoid Muller's ratchet [67].

Although examination of recombination rate is standard in studies of sex chromosomes [18], statistical detection of recombination suppression or elevation is not always straightforward. Until recently, most studies of plant recombination heterogeneity lacked a physical map (e.g. [68]-[70]), and thus could only compare the relative densities of markers at linkage map positions. Our approach of integrating linkage maps with reliable reference sequences, which is increasingly common [29],[34],[71], affords much more precision. Nevertheless, such recombination estimates carry several caveats. The first caveat is the challenge of designating an appropriate control. For example, to test if the recombination rate in an SDR is unusual, it could potentially be compared to the orthologous region in the homogametic parent, the PAR, the homeologous chromosomes, the autosomes, or the genomes of outgroup species, with variable results [72],[73]. By considering all of these comparisons, we can achieve a more nuanced view of recombination heterogeneity. For example, although maternal recombination is lower at the SDR than the PAR (Fig 4), this is due at least as much to elevated recombination at the PAR as to suppressed recombination at the SDR. A second caveat to all our recombination analyses is that physical distances are estimated from the Fvb reference genome. Major rearrangements between *F. chiloensis* and *F. vesca* subsp. *bracteata*, such as large insertions or deletions, would affect our estimates. However, we minimized the effects of this limitation in several ways: by identifying and avoiding rearrangements in the target capture

map, by focusing on the subgenome (Av) which is most closely related to *F. vesca* subsp. *bracteata*, and by making direct comparisons between maternal and paternal maps under the assumption that most large rearrangements would be present in both parents. Thus, our conclusions are robust to both of these caveats.

# **Evolutionary dynamics at the SDR vicinity**

The *F. chiloensis* SDR represents the narrowest fine-mapping of any *Fragaria* sex locus to date. It is distinct from the *F. virginiana* subsp. *virginiana* SDR which also occurs on a VI chromosome [11],[48]. Furthermore, the *F. chiloensis* SDR is distinct from one of the male-function-influencing loci *F. vesca* subsp. *bracteata*, the *Rr* locus which intriguingly occurs less than 1 Mb away at Fvb6\_34.839-36.607Mb [44], but confers recessive male sterility (*rr*). Perhaps the VI chromosome, especially the distal end between Fvb6\_34-38Mb, is particularly suited to controlling sex phenotype [11]. The myriad sex loci among closely related *Fragaria* species suggest a dynamic evolutionary process that may involve repeated independent sterility mutations, gene translocations, and/or shifting genetic control of phenotype. In fact, turnovers driven by sexually antagonistic genes and/or escape from mutational load also can produce “ever young” small SDRs [74] and can account for XY to ZW transitions as well. These are expected to be particularly common in species with undifferentiated sex chromosomes, and some autosomal pairs are more likely than others to be recruited [74],[75]. Such dynamics have been proposed to be responsible for the variation in position of the SDR and heterogamety in willows [60].

In contrast to the variable basis of sex determination between species, the SDR is highly consistent within *F. chiloensis*. The same SDR was identified in two additional *F. chiloensis* crosses from populations up to 1000 km away, suggesting it may be the most common, or only, SDR in this species, at least in North America. A single “universal marker” was in coupling with male sterility/female fertility phenotype in all three crosses, and this SNP also showed near-perfect association with sex across a set of unrelated plants. Of the two exceptions, one plant was the sole specimen from South America which may have a distinct sex determining mechanism. The other was from the same population as one of the crosses (PTR), suggesting either that the SDR does not perfectly control sex in all cases, or that the universal marker is not in perfect linkage disequilibrium with the causal gene(s). One consequence of recombination suppression should be that a W-specific haplotype behaves as a single unit in population genetics, with multiple SNPs in linkage disequilibrium with sex. The fact that only a single universal marker was observed, despite our sequencing ~2% of the 280kb SDR, suggests that there are few SNPs (less than 100) showing such high linkage disequilibrium with sex. In turn, this observation suggests that the true SDR may be substantially smaller than the 280kb mapped region, although we cannot definitively demonstrate this.

We observe a particularly high concentration of maternally-heterozygous SNPs in a small genomic section corresponding to the second half of the SDR (Fig 3, Fig S1). Thus, divergence between W and Z is particularly high in this window, especially for SNPs in coupling with male sterility/female fertility and therefore W-specific within crosses. Note that, other than the universal marker, these SNPs are not W-specific across populations, but some may be W-specific within populations. Our study design doesn’t allow us to examine divergence shared by all Z chromosomes but not the W, since such Z-specific SNPs will occur in both parents and thus



will not segregate in the offspring. Female-specific mutations could accumulate at the SDR for several reasons: suppressed recombination, selection against recombinants, or low effective population size at the SDR due to fluctuating sex ratios, such that deleterious mutations are not purged by selection [29],[32]. As discussed above, the accumulation of deleterious W-specific mutations could potentially explain why high recombination in the PAR is adaptive. These processes could lead to even greater Z-W differentiation. Alternatively, given that heteromorphic sex chromosomes seem to have only rarely become established in dioecious flowering plants, these may not necessarily evolve in *F. chiloensis*, and Z-W divergence could remain subtle indefinitely, especially if recombination eliminates W-specific changes.

## Conclusions

We have characterized an incipient ZW sex chromosome in a dioecious wild strawberry, pinpointing a single SDR controlling both male and female function within a narrow genomic window, and examining recombination and divergence patterns in Z-Z and Z-W pairs. Along with other recent studies of homomorphic plant sex chromosomes [20],[27-34], this work suggests that small, modestly divergent SDRs may be typical of many dioecious plants. By extensively analyzing recombination, this study reveals rate heterogeneity patterns both expected and surprising, which could nonetheless be typical of such young sex chromosomes. Our work is also novel in that *F. chiloensis* has a ZW system and that it is a higher-order polyploid, thus extending our understanding of small plant SDRs beyond XY diploids. These subtle plant SDRs may be affiliated with relatively low sexual dimorphism, and thus little selection pressure on genes to become tightly linked to sex [38], consistent with few observed sex differences in *F.*

*chiloensis* [50] (but see [8]). When compared with classic, highly heteromorphic sex chromosomes of other taxa [22],[23],[71], our results speak to the diversity of genomic patterns in sexual species. However, even when the SDR represents a tiny fraction of the genome, linkage to sex may have important consequences for loci all along the sex chromosome, as exemplified here by the elevated PAR recombination rate.

The evolutionary processes that generate and modify sex chromosomes across taxa are now partially understood, but remain to be fully characterized. Theoretical assumptions, like that elevated PAR recombination serves to compensate for suppression at the SDR, or that SDRs evolve from two linked genes controlling male and female function, may not hold true for all taxa. The patterns of recombination, divergence, and linkage disequilibrium observed in the *F. chiloensis* ZW chromosomes can be further explored by measuring fitness, gene function, and population genetic parameters. This species thus presents an ideal opportunity for continued study of the emergence of sex chromosomes.

## Materials and Methods

### Samples

The primary cross examined in this study (here designated HM×SAL) represents an expanded set of F1 offspring from an intraspecific cross involving a female *F. chiloensis* subsp. *lucida* (GP33) and a hermaphroditic *F. chiloensis* subsp. *pacifica* (SAL3) used in previous work [27]. The maternal parent was obtained from the USDA National Clonal Germplasm Repository (accession no. PI 612489; ‘HM1’) which was originally collected from Honeyman Memorial

State Park, Oregon (43.93N, 124.11W). To emphasize its population of origin, shared by several other plants in the current study (S3 Table), we here use the designation of the maternal parent as HM1 (although note previously this cross was referred to as GP33xSAL [27]). The paternal parent was collected from Salishan, Oregon (44.91N, 124.02W) and is a low fruit-producing hermaphrodite (10% of hand-pollinated flowers yielded fruits in the greenhouse). We hand pollinated pistillate flowers of HM1 with the pollen from SAL3. We planted a total of 1695 seeds in sets across five years (between 2009 and 2015) and 75% of which germinated. We transplanted ~ 2-month old seedlings into 3-inch-square pots filled with a 2:1 mixture of Fafard #4 (Conrad Fafard) and sand. In the first growing period after germination in each year the plants received a total of 513 mg of granular Nutricote 13:13:13 N:P:K fertilizer (Chisso-Asahi Fertilizer). All plants were grown under mild temperatures (15°/20° night/day) and 10- to 12-hr days throughout the majority of the flowering period. To initiate flowering plants were exposed to cooler temperatures (8°/12° night/day) with an 8 hr day with low light. Additional liquid fertilizer and pest control measures were applied as needed to maintain the health of the plants to flowering.

We also examined the parents and F1 offspring of two other independent *F. chiloensis* crosses, in order to test the universality of the location of the SDR identified in HM×SAL and to identify SNPs universally in coupling with male sterility/female fertility (i.e., on the W haplotype of the SDR). The parents of the first cross (EUR) were a female (EUR13) and a male (EUR3; 0% fruit set) *F. chiloensis* subsp. *lucida* collected from Eureka, California (40.762 N, 124.225 W). The parents of the second cross (PTR) were a female (PTR14) and a low fruit-producing hermaphrodite (PTR19; 10% fruit set) *F. chiloensis* subsp. *lucida* collected from Point Reyes, California (38.0683 N, 122.971 W). We raised 105 and 65 F1 offspring from the two crosses,

respectively, following the same planting and growth regimes as in HM×SAL cross. As the goal of these crosses was validation of the sex-linked SNP results from the HM×SAL cross, rather than fine-mapping, we examined substantially fewer offspring than for HM×SAL. Twenty offspring from each cross are studied further here.

In addition, we examined 16 unrelated plants from six populations (the four source populations of cross plants and two other populations) across the geographic range of *F. chiloensis* (S3 Table). The plants were collected from the wild as clones or obtained from the National Clonal Germplasm Repository and raised under the same planting and growth conditions as described above.

## Sex phenotyping

We scored plants of HM×SAL for both male and female function following Spigler et al. [11]. We scored male function on at least two flowers per plant two separate times. Male function was scored as a binary trait: “male fertile” if the plant had large, bright-yellow anthers that visibly released pollen, and “male sterile” if the plant had vestigial white or small, pale-yellow anthers that neither dehisced nor showed mature pollen. Any anthers that were in question were examined microscopically for the presence of mature pollen. To ensure full potential fruit set, we hand pollinated all plants three times per week with outcrossed pollen. We then estimated female fertility for each individual as the proportion of flowers that produced fruit by dividing the total number of fruits by the total number of pollinated flowers produced as in Spigler et al. [11]. In order to measure to extent to which male sterility co-occurs with female

fertility, we calculated the association between male function and female function using simple linear regression [76]. Because female fertility may be influenced by plant size (here estimated as the total number of flowers [or buds] produced), we also included total flower number as a second independent variable in multiple regression [76]. In QTL analysis, female function was examined as a continuous quantitative trait. For progeny in the EUR and PTR crosses and the unrelated individuals male function was scored similarly as HM×SAL, but female function was scored only as binary.

## **DNA extraction and quantification**

We extracted DNA from fresh or dry leaf tissue. Fresh tissue extractions using a modified CTAB method were done on 42 F1 offspring from the 2009 mapping population for target capture sequencing to construct initial high density linkage map, as described previously [45]. For the remaining HM×SAL offspring, we collected leaf tissue from seedlings or adult plants and stored on silica gel. Similarly, for the EUR and PTR *F. chiloensis* crosses, we collected, dried and extracted DNA from leaves of a total of 20 offspring representing 10 females and 10 pollen-bearing morphs (hermaphrodites or males) from each cross. To extract DNA from dry tissue samples, we used the Norgen biotek plant/fungi high-throughput 96 well DNA isolation kit (Norgen Biotek, ON, Canada) and also used DNA extraction service provider Agbiotech Inc (CA, USA). We added an additional 100ul 10% SDS and 10ul β-mercaptoethanol to the lysis buffer to improve DNA yield from all the dry tissue samples. The final DNA elution was sodium acetate/ethanol precipitated to wash and concentrate the DNA. Picogreen assays were performed using a Tecan plate reader to measure DNA concentration for each sample, and we diluted DNA

to 50ng/ul using DEPC treated water to use in microfluidics PCR on the Fluidigm access array system (see below).

# **Target capture mapping**

We previously described a target capture linkage map of 2542 segregating markers generated using 42 HM×SAL offspring [45]. All markers align to a distinct position in the haploid *F. vesca* reference genome (v. 2.0, here designated “Fvb” as in [45]), and also have a linkage map position in cM on a paternal (“p”) or maternal (“m”) linkage group pertaining to one of the four octoploid subgenomes (Av, B1, B2, or Bi). In order to map sex phenotypes, we first coded male function as a binary trait (male sterile=0; male fertile=1) and added it to the linkage map with OneMap [77], as in Tennessen et al. [43]. Because female function is defined as a proportion between 0 and 1, rather than a binary trait, we identified female function quantitative trait locus (QTL) using R/qtl [76],[78]. Specifically, we first used the scanone option to identify all possible female function QTL, using a minimum LOD threshold of 3. Then we checked whether more than one additive QTL was independently supported using the scantwo option; a model with two additive QTL would need a LOD at least 3 greater than the LOD of the single best QTL in order to be significant. The region of the Fvb genome where both male function and female function QTL mapped, presumably harboring the SDR and possibly also adjacent portions of the PAR, was designated the “SDR vicinity” and examined with additional genotyping as described below.

In order to estimate genome-wide recombination rates, we first re-examined the published linkage maps of HM×SAL [45] to confirm all recombination events by eye and eliminate putative recombination events that could be caused by genotyping error. As in previous studies [43],[45], a pair of adjacent recombination events in the same individual on either side of a single marker was considered to be a genotyping error rather than a real double recombination event. We also identified all inconsistencies in marker order when compared with the Fvb reference genome. If an inconsistency could be explained by a single incorrect genotype, it was attributed to genotyping error, otherwise it was considered to be a genomic rearrangement (either a genome assembly error or a real translocation, the distinction is irrelevant here). We assumed that physical distances on the octoploid chromosomes could be approximated by Mb distances in the Fvb reference genome, and thus we estimated recombination rates genome-wide and per each linkage group as cM/Mb. Although the 0.7 Gb octoploid *Fragaria* genome has likely undergone some gene loss and other rearrangements relative to the 0.2 Gb diploid reference [45],[52], these discrepancies should have a minimal effect when comparing relative rates among linkage groups, and should also be rarest on the Av subgenome containing the sex chromosome because it originates from *F. vesca* subsp. *bracteata*. In order to further examine variation in recombination rate across the genome of *F. chiloensis*, we divided all 56 linkage groups in the genome into segments of 5-10Mb that were free from rearrangements, and calculated recombination rates for each of these segments.

## **Amplicon generation and sequencing**

In order to fine-map the SDR vicinity and examine recombination rates, we genotyped sites in SDR vicinity using Illumina sequencing of targeted amplicons [79]. The Fluidigm microfluidic approach is an effective method for mapping SNP markers in a large sample of polyploids [80],[81], and by sequencing amplicons we can unambiguously assign markers to a genomic position. We performed sequencing in three sequential rounds, refining the combination of targeted amplicons each time based on amplicon performance and fine-mapping results (S7 Table; S8 Table). Some samples were included in multiple rounds due to poor-quality genotypes or in order to further fine map recombinants. Initially, we designed primers for 48 amplicons of approximately 300-600bp (we found that larger amplicons performed poorly), with a Fvb reference genome position within the SDR vicinity. Most amplicons (41) contained at least one SNP (on any subgenome) identified in the target capture map. We used the Fluidigm 48.48 Access Array IFC (Integrated Fluidic Circuits) to generate amplicons in parallel. These steps were performed by IBEST at the University of Idaho. The forward and reverse primers were attached with common sequence tags (CS1 & CS2) to enable the addition of P5 and P7 Illumina adapters along with dual index multiplex barcodes during the four primer PCR reactions. All primer pairs were validated using DNA from parent HM1 to verify the expected product size and ascertain the on-target products to account for a minimum of 50% of the total yield (by mass) for each primer pair. For validation PCR and optimization we followed the Fluidigm Access Array System user guide for Illumina (<https://www.fluidigm.com/documents>; Access Array 48.48-4-primer-amplicon-tagging). We used the Agilent bioanalyzer (Agilent Technologies Inc.) to determine the expected amplicon size and yield. We redesigned primers to meet the validation criteria as necessary. After validation, we generated amplicons in microfluidic reactors, tagging each amplicon with unique dual index barcodes. We multiplex sequenced 48 pools of amplicons



(one per individual) in 10-12 access array plates on one-half lanes of the Illumina MiSeq, yielding 300-bp paired-end reads. For the first round we sequenced 478 HM×SAL offspring and the two parents. For the second round of sequencing, we retained 19 of the original 48 primer pairs and replaced 29 with newly designed primer pairs. We used these to sequence 469 HM×SAL offspring, the two HM×SAL parents, and the parents and 20 offspring each from the EUR and PTR crosses. For the third round of sequencing, we retained 39 primer pairs and replaced 9 with newly designed primer pairs, and we used these to sequence 545 HM×SAL offspring, the two HM×SAL parents, the same EUR and PTR individuals from the second round, and 18 additional unrelated plants (16 of which yielded useable genotypes and were analyzed here). In total, 1302 unique plants were included in amplicon sequencing. Including the target capture samples, a total of 1274 HM×SAL offspring were genotyped.

## **Amplicon genotyping and fine mapping**

We called genotypes using the POLiMAPS approach [45]. In brief, we first processed Illumina reads with dbcAmplicons (<https://github.com/msettles/dbcAmplicons>), trimmed them with Trimmomatic [82], aligned them to the amplicon regions extracted from Fvb reference genome with BWA [83], and generated pileup files with SAMtools [84]. We called genotypes in the pileup file using the same coverage criteria as in the target capture map [45], i.e. minimum depth of 32, alternate allele must occur in an individual at least twice and at  $\geq 2.5\%$  frequency, only SNPs heterozygous in a single parent are considered. However, because sample sizes were larger and there were more missing genotypes than in the target capture map, we adjusted the additional criteria for HM×SAL amplicons, allowing up to 200 missing genotypes per site and

requiring 40 observations each of homozygotes and heterozygotes for a SNP to be called as real. For EUR, PTR, and the set of unrelated plants, all with much smaller sample sizes, we allowed up to 10 missing genotypes and required 4 observations each of homozygotes and heterozygotes. We converted genotypes to OneMap format and generated linkage maps in OneMap with a LOD criterion of 3.

We identified recombination events and used these to estimate recombination rates in the SDR vicinity and to fine map sex QTL. Because male function showed a near-perfect match to genotype, and the few exceptions were not recombinants in the SDR vicinity, we simply defined the male function region as the section of chromosome between the closest recombination events both upstream and downstream that caused mismatches between genotype and male function. Because female function is a continuous trait showing a weaker correlation with genotype, we calculated LOD scores for all sites in the SDR vicinity. We also calculated the correlation between genotype and female function across the SDR vicinity and used the R/cocor package [75],[85] to compare these correlations and thus to define the female function region as the region in which correlations were not significantly different from that at the site with the best LOD score. Because male function could thus be more precisely mapped than female function, we considered the male function region to comprise the maximum potential extent of the SDR. We examined genes within the male function region by consulting both the original annotation of the Fvb genome [45],[86] and a recent re-annotation by Darwish et al. [51]. As with the whole-genome analysis from the target capture map, we estimated recombination rate as cM/Mb, with physical distance estimated from the Fvb reference genome. This assumption is particularly justified for the Av subgenome because it originates with *F. vesca* subsp. *bracteata* [45].

744

## 745 **Acknowledgements**

746 The authors thank C. Kustek, K. Mazzaferro, L. Stanley, K. Schuller, R. Dalton, H. Wipf, E.  
 747 York for greenhouse, field or laboratory assistance, B. Rosa-Neves for help error-checking the  
 748 linkage maps, the Ashman and Liston labs for comments that improved the manuscript. This  
 749 work was supported by the University of Pittsburgh, the National Science Foundation (DEB  
 750 1020523, DEB 1241006, and RET/REU supplements to TLA; DEB 1020271 and DEB 1241217  
 751 to AL).

752

## 753 **References**

- 754 1. Bull JJ. Evolution of sex determining mechanisms. Benjamin/Cummings: Menlo Park,  
 755 CA. 1983.
- 756 2. Charlesworth D, Mank JE. The birds and the bees and the flowers and the trees: lessons  
 757 from genetic mapping of sex determination in plants and animals. Genetics. 2010;186: 9-  
 758 31.
- 759 3. Haldane JBS. Sex ratio and unisexual sterility in hybrid animals. J Genet. 1922;12: 101-  
 760 109.
- 761 4. Turelli M, Orr HA. The dominance theory of Haldane's rule. Genetics. 1995;140: 389-  
 762 402.

5. Brothers AN, Delph LF. Haldane's rule is extended to plants with sex chromosomes. *Evolution*. 2010;64: 3643-3648.
6. Chang D, Gao F, Slavney A, Ma L, Waldman YY, Sams AJ, et al. Accounting for eXentricities: analysis of the X chromosome in GWAS reveals X-linked genes implicated in autoimmune diseases. *PLoS One*. 2014;9: e113684.
7. Evans BJ, Pyron RA, Wiens JJ. Polyploidization and sex chromosome evolution in amphibians. In: Soltis, PS, Soltis, DE, editors. *Polyploidy and genome evolution*. Springer. 2012. pp 385-410.
8. Ashman TL, Kwok A, Husband BC. Revisiting the dioecy-polyploidy association: alternate pathways and research opportunities. *Cytogenet Genome Res*. 2013;140: 241-255.
9. Zechner U, Wilda M, Kehrner-Sawatzki H, Vogel W, Fundele R, Hameister H. A high density of X-linked genes for general cognitive ability: a run-away process shaping human evolution? *Trends Genet*. 2001;17: 697-701.
10. Wilkinson GS, Amitin EG, Johns PM. Sex-linked correlated responses in female reproductive traits to selection on male eye span in stalk-eyed flies. *Integr Comp Biol*. 2005;45: 500-510.
11. Spigler RB, Lewers KS, Ashman TL. Genetic architecture of sexual dimorphism in a subdioecious plant with a proto-sex chromosome. *Evolution*. 2011;65: 1114-1126.

12. Mank JE, Hosken DJ, Wedell N. Conflict on the sex chromosomes: cause, effect, and complexity. *Cold Spring Harb Perspect Biol.* 2014;6: a017715.
13. Bachtrog D, Mank JE, Peichel CL, Kirkpatrick M, Otto SP, Ashman TL, et al. Sex determination: why so many ways of doing it? *PLoS Biol.* 2014;12: e1001899.
14. Ohno S. Evolution of the sex chromosomes in mammals. *Ann Rev Genet.* 1969;3: 495–524.
15. Otto SP, Pannell JR, Peichel CL, Ashman TL, Charlesworth D, Chippindale AK, et al. About PAR: the distinct evolutionary dynamics of the pseudoautosomal region. *Trends Genet.* 2011;27: 358-367.
16. Bergero R, Charlesworth D. The evolution of restricted recombination in sex chromosomes. *Trends Ecol Evol.* 2009;24: 94-102.
17. Hinch AG, Altemose N, Noor N, Donnelly P, Myers SR. Recombination in the human pseudoautosomal region PAR1. *PLoS Genet.* 2014;10: e1004503.
18. Charlesworth D. Plant contributions to our understanding of sex chromosome evolution. *New Phytol.* 2015;208: 52–65.
19. Charlesworth B, Charlesworth D. A model for the evolution of dioecy and gynodioecy. *Am Nat.* 1978;112: 975–997.
20. Spigler RB, Lewers KS, Main DS, Ashman TL. Genetic mapping of sex determination in a wild strawberry, *Fragaria virginiana*, reveals earliest form of sex chromosome. *Heredity (Edinb).* 2008; 101: 507-517.

21. Lahn BT, Page DC. Four evolutionary strata on the human X chromosome. *Science*. 1999;286: 964-967.
22. Bernardo Carvalho A, Koerich LB, Clark AG. Origin and evolution of Y chromosomes: *Drosophila* tales. *Trends Genet*. 2009;25: 270-277.
23. Cortez D, Marin R, Toledo-Flores D, Froidevaux L, Liechti A, Waters PD, et al. Origins and functional evolution of Y chromosomes across mammals. *Nature*. 2014;508: 488-493.
24. Diggle PK, Di Stilio VS, Gschwend AR, Golenberg EM, Moore RC, Russell JR, et al. Multiple developmental processes underlie sex differentiation in angiosperms. *Trends Genet*. 2011;27: 368-376.
25. Renner SS. The relative and absolute frequencies of angiosperm sexual systems: dioecy, monoecy, gynodioecy, and an updated online database. *Am J Bot*. 2014;101: 1588-1596.
26. Ming R, Bendahmane A, Renner SS. Sex chromosomes in land plants. *Annu Rev Plant Biol*. 2011;62: 485-514.
27. Goldberg MT, Spigler RB, Ashman TL. Comparative genetic mapping points to different sex chromosomes in sibling species of wild strawberry (*Fragaria*). *Genetics*. 2010. 186: 1425-1433.
28. Fechter I, Hausmann L, Daum M, Sörensen TR, Viehöver P, Weisshaar B, et al. 2012. Candidate genes within a 143 kb region of the flower sex locus in *Vitis*. *Mol Genet Genomics*. 287: 247-259.

29. Wang J, Na JK, Yu Q, Gschwend AR, Han J, Zeng F, et al. Sequencing papaya X and Yh chromosomes reveals molecular basis of incipient sex chromosome evolution. *Proc Natl Acad Sci U S A*. 2012;109: 13710-13715.
30. Picq S, Santoni S, Lacombe T, Latreille M, Weber A, Ardisson et al. A small XY chromosomal region explains sex determination in wild dioecious *V. vinifera* and the reversal to hermaphroditism in domesticated grapevines. *BMC Plant Biol*. 2014;14: 229.
31. Filatov DA. Homomorphic plant sex chromosomes are coming of age. *Mol Ecol*. 2015; 24: 3217-3219.
32. Geraldès A, Hefer CA, Capron A, Kolosova N, Martínez-Núñez F, Soolanayakanahally RY, et al. Recent Y chromosome divergence despite ancient origin of dioecy in poplars (*Populus*). *Mol Ecol*. 2015;24: 3243-3256.
33. Russell JR, Pannell JR. Sex determination in dioecious *Mercurialis annua* and its close diploid and polyploid relatives. *Heredity (Edinb)*. 2015;114: 262-271.
34. Zhang Q, Liu C, Liu Y, VanBuren R, Yao X, Zhong C, et al. High-density interspecific genetic maps of kiwifruit and the identification of sex-specific markers. *DNA Res*. 2015;22: 367-375
35. Miller JS, Venable DL. Polyploidy and the evolution of gender dimorphism in plants. *Science*. 2000;289: 2335-2338.
36. Zhou Q, Zhang J, Bachtrog D, An N, Huang Q, Jarvis ED, et al. Complex evolutionary trajectories of sex chromosomes across bird taxa. *Science*. 2014;346: 1246338.

37. Dufresnes C, Borzée A, Horn A, Stöck M, Ostini M, Sermier R, et al. Sex-chromosome homomorphy in palearctic tree frogs results from both turnovers and X-Y recombination. *Mol Biol Evol.* 2015;32: 2328-2337.
38. Ahmed S, Cock JM, Pessia E, Luthringer R, Cormier A, Robuchon, et al. A haploid system of sex determination in the brown alga *Ectocarpus* sp. *Curr Biol.* 2014; 24: 1945-1957.
39. Bergero R, Qiu S, Forrest A, Borthwick H, Charlesworth D. Expansion of the pseudo-autosomal region and ongoing recombination suppression in the *Silene latifolia* sex chromosomes. *Genetics.* 2013;194: 673-686.
40. Ashman, TL, Spigler RB, Goldberg M, Govindarajulu R. *Fragaria*: a polyploid lineage for understanding sex chromosome evolution. In: Navajas-Pérez R, editor. *New insights on plant sex chromosomes*. Nova Science Publishers; 2012. pp. 67-90.
41. Liston A, Cronn R, Ashman TL. *Fragaria*: a genus with deep historical roots and ripe for evolutionary and ecological insights. *Am J Bot.* 2014;101: 1686-1699.
42. Njuguna W, Liston A, Cronn R, Ashman T-L, Bassil N. Insights into phylogeny, sex function and age of *Fragaria* based on whole chloroplast genome sequencing. *Mol Phylogenet Evol.* 2013;66: 17–29.
43. Tennessen JA, Govindarajulu R, Liston A, Ashman TL. Targeted sequence capture provides insight into genome structure and genetics of male sterility in a gynodioecious diploid strawberry, *Fragaria vesca* ssp. *bracteata* (Rosaceae). *G3 (Bethesda).* 2013;3: 1341-1351.



44. Ashman TL, Tennessen JA, Dalton R, Govindarajulu R, Koski M, Liston A. Multilocus sex determination revealed in two populations of gynodioecious wild strawberry, *Fragaria vesca* subsp. *bracteata*. G3. 2015. doi: 10.1534/g3.115.023358
45. Tennessen JA, Govindarajulu R, Ashman TL, Liston A. Evolutionary origins and dynamics of octoploid strawberry subgenomes revealed by dense target capture linkage maps. Genome Biol Evol. 2014;6: 3295-3313.
46. Govindarajulu R, Parks M, Tennessen JA, Liston A, Ashman TL. Comparison of nuclear, plastid, and mitochondrial phylogenies and the origin of wild octoploid strawberry species. Am J Bot. 2015;102: 544-554.
47. Sargent, DJ, Yang Y, Šurbanovski N, Bianco L, Buti M, Velasco R, Giongo L, Davis TM. HaploSNP affinities and linkage map positions illuminate subgenome composition in the octoploid, cultivated strawberry (*Fragaria* × *ananassa*). Plant Sci. 2015; doi:10.1016/j.plantsci.2015.07.004
48. Spigler RB, Lewers KS, Johnson AL, Ashman TL. Comparative mapping reveals autosomal origin of sex chromosome in octoploid *Fragaria virginiana*. J Hered. 2010; 101 Suppl 1: S107-117.
49. Hancock JF and Bringham RS. Sexual dimorphism in the strawberry *Fragaria chiloensis*. Evolution 1980;34: 762-768.
50. Ashman T-L. The limits on sexual dimorphism in vegetative traits in a gynodioecious plant. Am Nat. 2005;166 Suppl 4: S5-16.

51. Darwish O, Shahan R, Liu Z, Slovin JP, Alkharouf NW. Re-annotation of the woodland strawberry (*Fragaria vesca*) genome. BMC Genomics. 2015;16: 29.
52. Hirakawa H, Shirasawa K, Kosugi S, Tashiro K, Nakayama S, Yamada M. Dissection of the octoploid strawberry genome by deep sequencing of the genomes of *Fragaria* species. DNA Res. 2014; 21: 169-181.
53. Charlesworth B. The evolution of chromosomal sex determination and dosage compensation. Curr Biol. 1996;6: 149-162.
54. Bomblies K, Higgins JD, Yant L. Meiosis evolves: adaptation to external and internal environments. New Phytol. 2015;208: 306-323.
55. Shilo S, Melamed-Bessudo C, Dorone Y, Barkai N, Levy AA. DNA crossover motifs associated with epigenetic modifications delineate open chromatin regions in *Arabidopsis*. Plant Cell. 2015;27: 2427-2436.
56. Spigler RB, Ashman T-L. Sex ratio and subdioecy in *Fragaria virginiana*: the roles of plasticity and gene flow examined. New Phytol. 2011;190: 1058-1068.
57. Govindarajulu R, Liston A, Ashman T-L. Sex-determining chromosomes and sexual dimorphism: insights from genetic mapping of sex expression in a natural hybrid *Fragaria*  $\times$  *ananassa* subsp. *cuneifolia*. Heredity (Edinb). 2013;110: 430-438.
58. Li J, Koski MH, Ashman T-L. Functional characterization of gynodioecy in *Fragaria vesca* ssp. *bracteata* (Rosaceae). Ann. Bot. (Lond.) 2012; 109: 545–552.

59. Akagi T, Henry IM, Tao R, Comai L. A Y-chromosome-encoded small RNA acts as a sex determinant in persimmons. *Science*. 2014;346: 646-650.
60. Pucholt P, Rönnerberg-Wästljung AC, Berlin S. Single locus sex determination and female heterogamety in the basket willow (*Salix viminalis* L.). *Heredity (Edinb)*. 2015;114: 575-583.
61. Ahmadi H, Bringham RS. Genetics of sex expression in *Fragaria* species. *American Journal of Botany* 1991;78: 504-514.
62. Charlesworth D. Allocation to male and female function in hermaphrodites, in sexually polymorphic populations. *J Theor Biol*. 1989;139: 327-342.
63. Pennell TM, Morrow EH. Two sexes, one genome: the evolutionary dynamics of intralocus sexual conflict. *Ecol Evol*. 2013; 3: 1819–1834.
64. Chen L, Liu Y-G. Male sterility and fertility restoration in crops. *Annu Rev Plant Biol*. 2014;65: 579-606.
65. Besouw MT, Kremer JA, Janssen MC, Levchenko EN. Fertility status in male cystinosis patients treated with cysteamine. *Fertil Steril*. 2010;93: 1880-1883.
66. Field DL, Pickup M, Barrett SC. Comparative analyses of sex-ratio variation in dioecious flowering plants. *Evolution*. 2013;67: 661-672.
67. Muller HJ. The relation of recombination to mutational advance. *Mutat Res*. 1964;106: 2-9.

68. Ma H, Moore PH, Liu Z, Kim MS, Yu Q, Fitch MM, et al. High-density linkage mapping revealed suppression of recombination at the sex determination locus in papaya. *Genetics*. 2004;166: 419-436.
69. van Os H, Andrzejewski S, Bakker E, Barrena I, Bryan GJ, Caromel B, et al. Construction of a 10,000-marker ultradense genetic recombination map of potato: providing a framework for accelerated gene isolation and a genomewide physical map. *Genetics*. 2006;173: 1075-1087.
70. Miao H, Zhang S, Wang X, Zhang Z, Li M, Mu S, et al. A linkage map of cultivated cucumber (*Cucumis sativus* L.) with 248 microsatellite marker loci and seven genes for horticulturally important traits. *Euphytica* 2011;182: 167-176.
71. Papadopoulos AS, Chester M, Ridout K, Filatov DA. Rapid Y degeneration and dosage compensation in plant sex chromosomes. *Proc Natl Acad Sci U S A*. 2015;112:13021-13026.
72. Nachman MW. Variation in recombination rate across the genome: evidence and implications. *Curr Opin Genet Dev*. 2002;12: 657-663.
73. Natri HM, Shikano T, Merilä J. Progressive recombination suppression and differentiation in recently evolved neo-sex chromosomes. *Mol Biol Evol*. 2013;30: 1131-1144.
74. Blaser O, Neuenschwander S, Perrin N. Sex-chromosome turnovers: the hot-potato model. *Am Nat*. 2014;183: 140-146.

75. van Doorn GS, Kirkpatrick M. Transitions between male and female heterogamety caused by sex-antagonistic selection. *Genetics*. 2010;186: 629-645.
76. R Core Team. R: A language and environment for statistical computing. R Foundation for Statistical Computing, Vienna, Austria. 2013. <http://www.R-project.org/>.
77. Margarido GR, Souza AP, Garcia AA. OneMap: software for genetic mapping in outcrossing species. *Hereditas*. 2007;144: 78-79.
78. Broman, KW, Wu H, Sen S, Churchill GA. R/qtl: QTL mapping in experimental crosses. *Bioinformatics* 2003;19: 889–890.
79. Cronn R, Knaus BJ, Liston A, Maughan PJ, Parks M, Syring JV, et al. Targeted enrichment strategies for next-generation plant biology. *Am J Bot*. 2012;99: 291-311.
80. Byers RL, Harker DB, Yourstone SM, Maughan PJ, Udall JA. Development and mapping of SNP assays in allotetraploid cotton. *Theor Appl Genet*. 2012;124: 1201-1214.
81. Uribe-Convers S, Settles ML, Tank DC. A targeted subgenomic approach for phylogenomics based on microfluidic PCR and high throughput sequencing. 2015. doi: <http://dx.doi.org/10.1101/021246>
82. Bolger AM, Lohse M, Usadel B. Trimmomatic: A flexible trimmer for Illumina Sequence Data. *Bioinformatics*. 2014;30: 2114-2120.
83. Li H, Durbin R. Fast and accurate short read alignment with Burrows-Wheeler transform. *Bioinformatics*. 2009;25: 1754-1760.

84. Li H, Handsaker B, Wysoker A, Fennell T, Ruan J, Homer N, et al. The Sequence alignment/map (SAM) format and SAMtools. *Bioinformatics*. 2009;25: 2078–2079.

85. Diedenhofen B, Musch J. cocor: A Comprehensive Solution for the Statistical Comparison of Correlations. *PLoS ONE*. 2015;10: e0121945

86. Shulaev V, Sargent DJ, Crowhurst RN, Mockler TC, Folkerts O, Delcher AL, et al. The genome of woodland strawberry (*Fragaria vesca*). *Nat Genet*. 2011;43: 109-116.

## Supporting information captions

**S1 Table.** Phenotypes and genotypes for all HM×SAL offspring.

**S2 Table.** Phenotypes and genotypes of EUR and PTR offspring.

**S3 Table.** IDs and collection localities of plants unrelated to the parents of the crosses.

**S4 Table.** Positions of all markers in target capture linkage maps.

**S5 Table.** List of 70 genes in the 280kb window on Fvb reference chromosome 6 matching the *F. chiloensis* SDR

**S6 Table.** Recombination rates for all linkage groups.

**S7 Table.** Primers for amplicon sequencing

**S8 Table.** PCR conditions for all amplicons.

**Fig S1. Haplotypes in the SDR vicinity.** We resolved twelve haplotypes, two from each of the parents of three crosses (diagonally shaded bars). For the additional unrelated plants, we did not phase haplotypes but instead show all SNPs present in each diploid genotype (solid bars). SNPs that mapped to VI-Av-m in at least one cross were observed from amplicons (indicated with X's), and are plotted with an x-axis position corresponding to physical position on reference genome chromosome Fvb6. Within a haplotype, SNPs are staggered vertically if more than one occurred in the same amplicon. SNPs are categorized based on whether they are ever observed in coupling with sex (circles) or not (squares). The universal marker showing a correlation with sex across most plants is shown as a solid circle. A high density of SNPs in coupling with sex occurs in the SDR, especially in the “high W divergence” region from 37.565-37.708Mb.

Count of Individuals

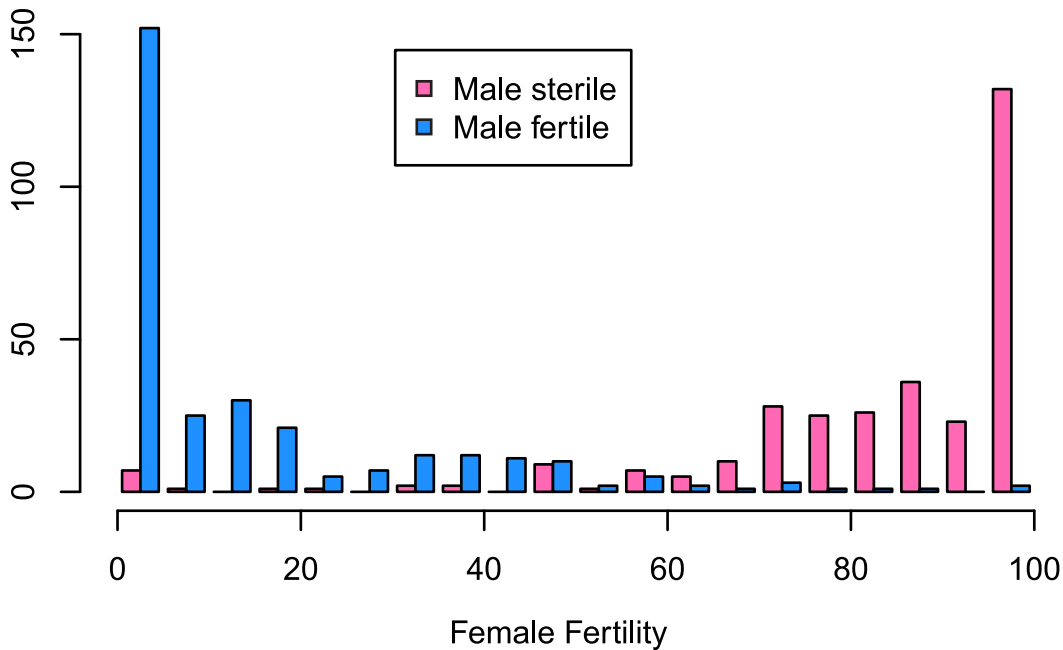



LOD to Male Function

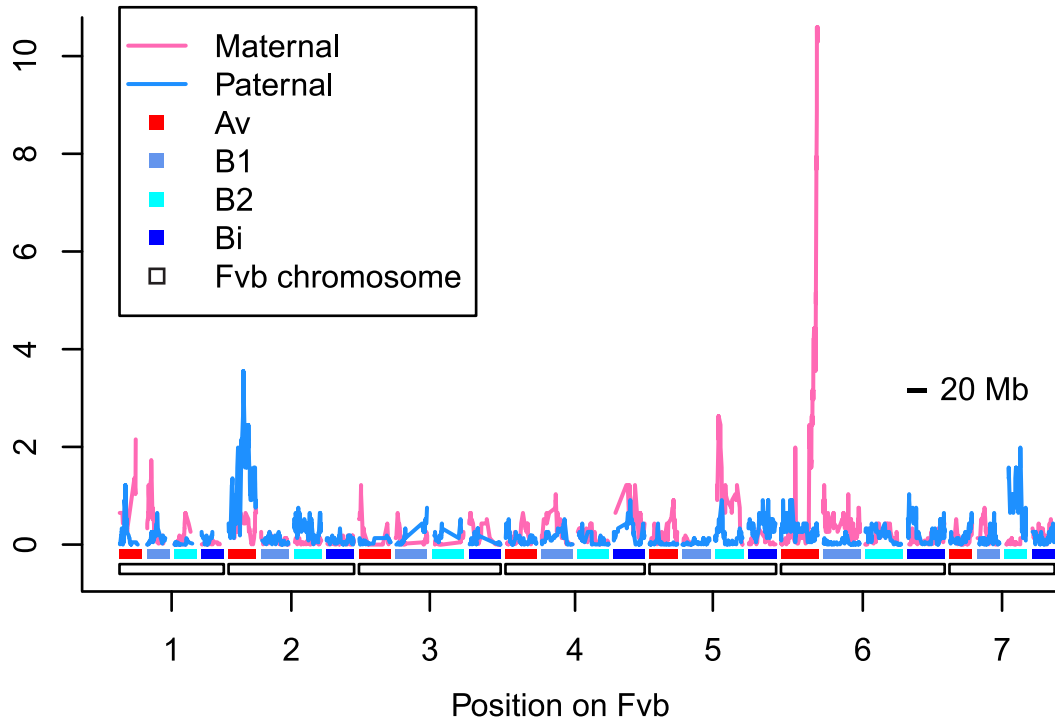

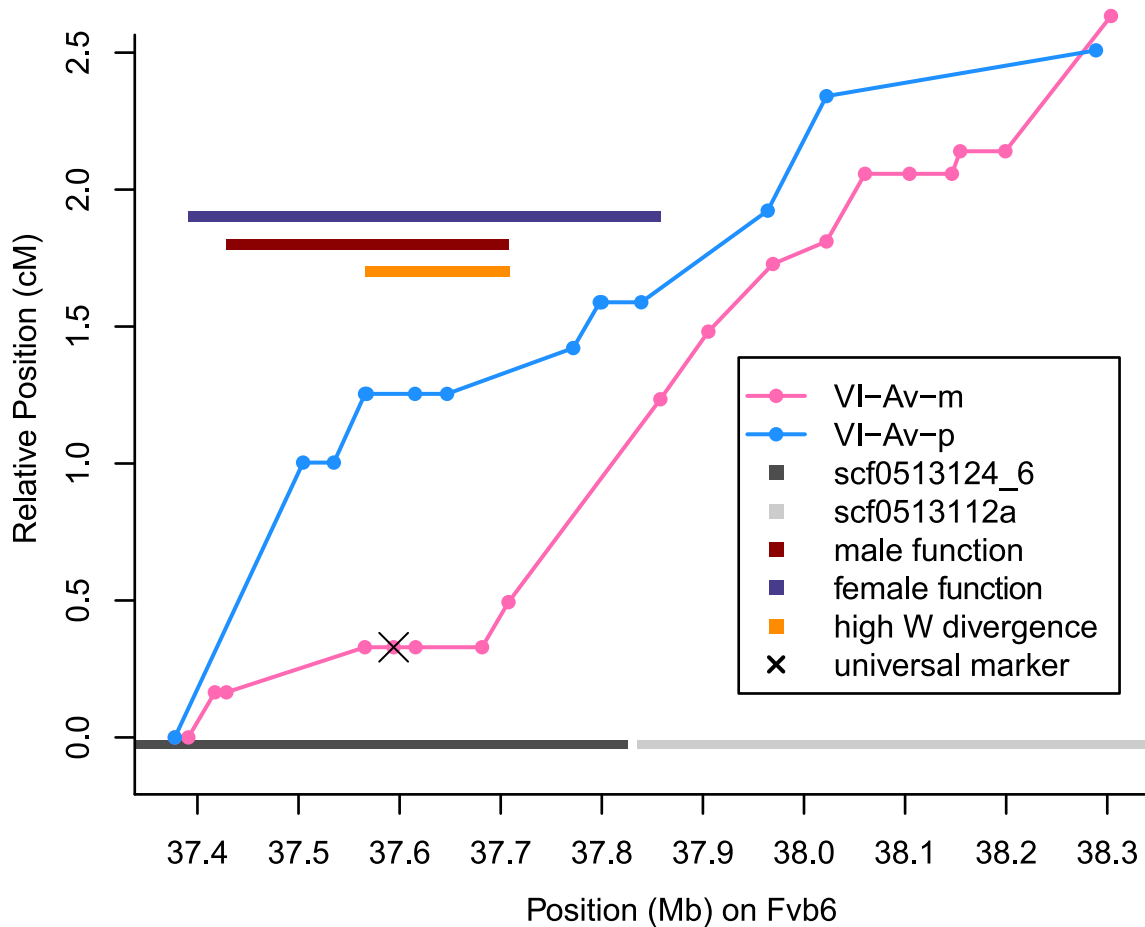

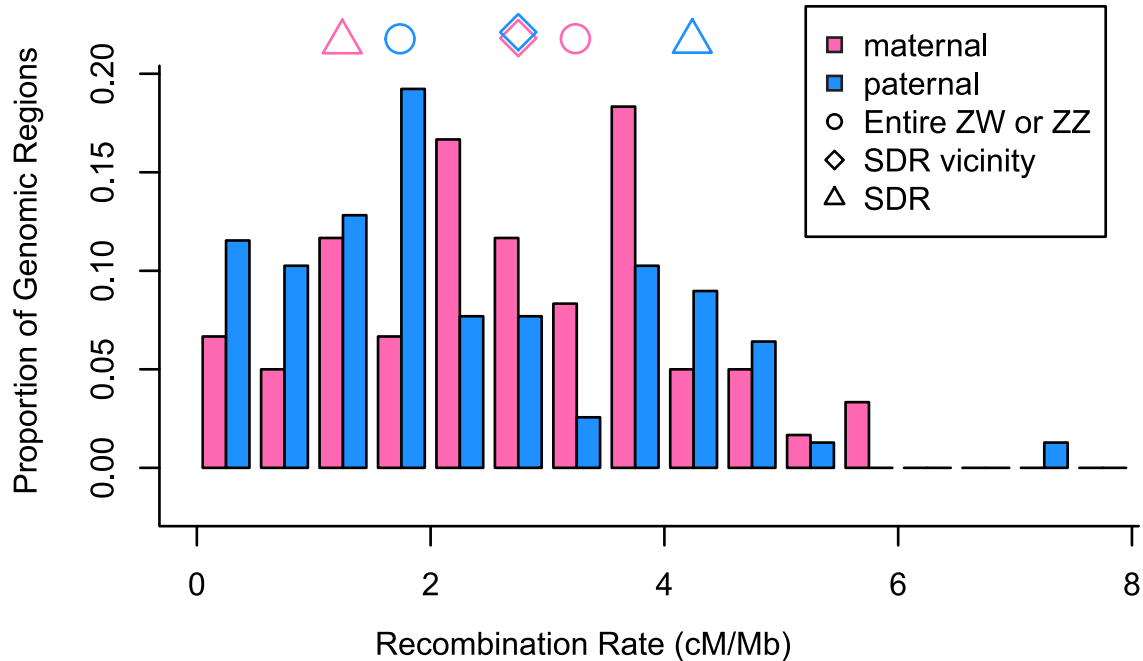

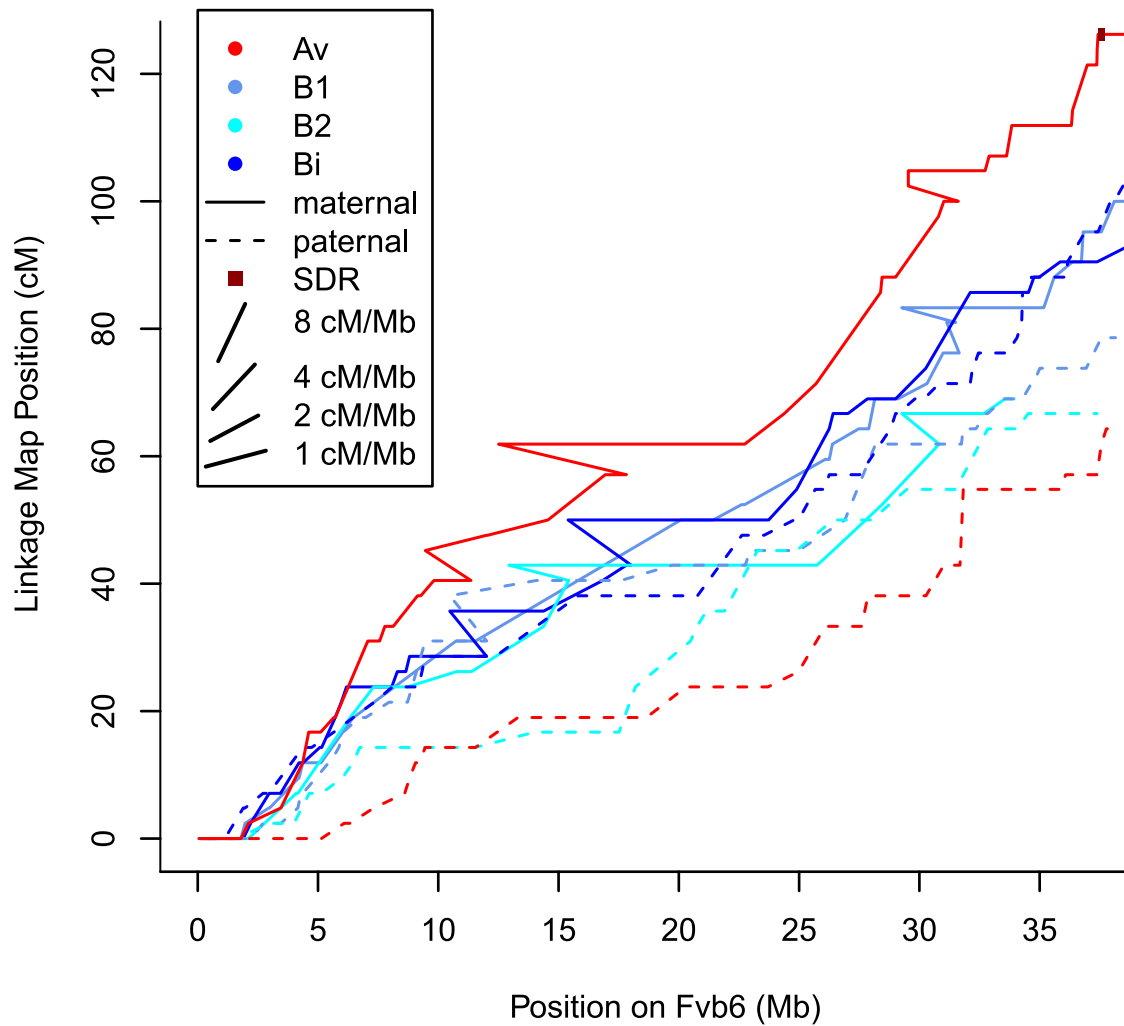

Source: http://biorxiv.org/content/10.1101/029611v1.full.pdf
